# Supplementary material
Source: Springer Nature journal article supplement (https://www.springermedizin.de/resource/supplementary/12950_2009_135_MOESM8_ESM.pdf/9558034)
Supplement: MOESM8 [file 9558034]

### TNF $\alpha$ and IL10 release in plasma 180 min after LPS injection

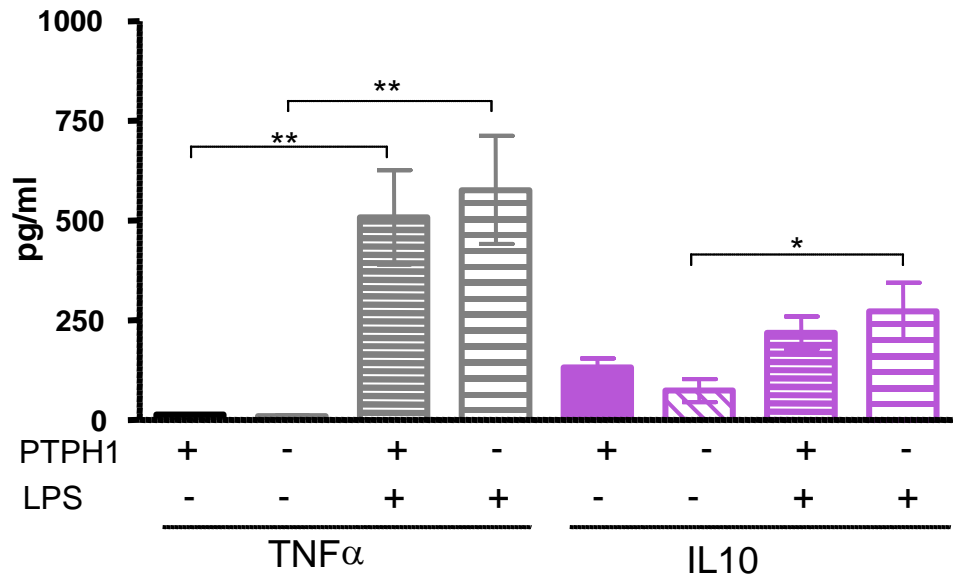

**a**

### MCP-1 and IL6 release in plasma 180 min after LPS injection

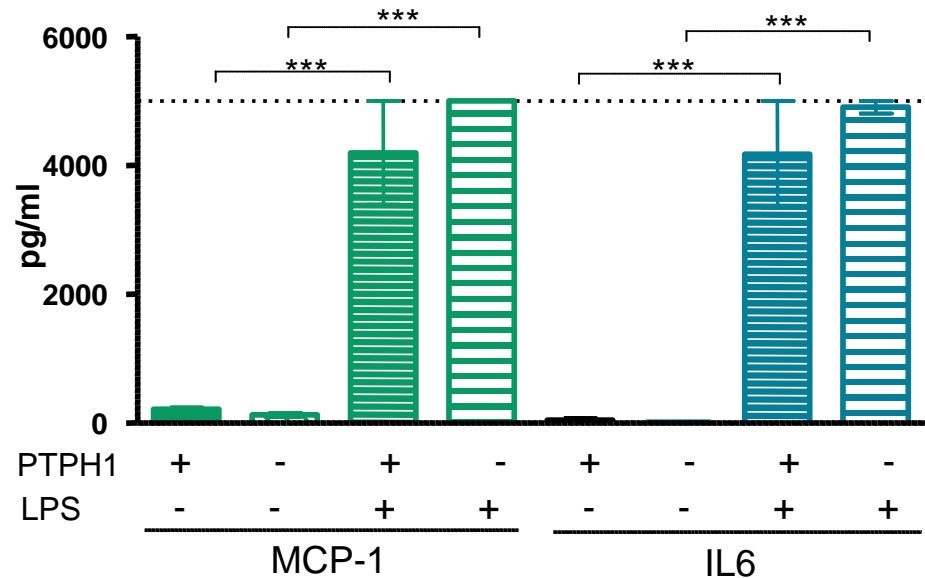

**b**
